# Supplementary material
Source: HighWire-hosted journal article supplement (https://cmaj.ca/highwire/filestream/59596/field_highwire_adjunct_files/3/150771-res-Appendix_2.pdf)

**Appendix 2 (as supplied by the authors):** Overlap in distribution of propensity scores for using ARB in ACEI and ARB cohorts before (A) and after (B) matching

**(A) Before matching**

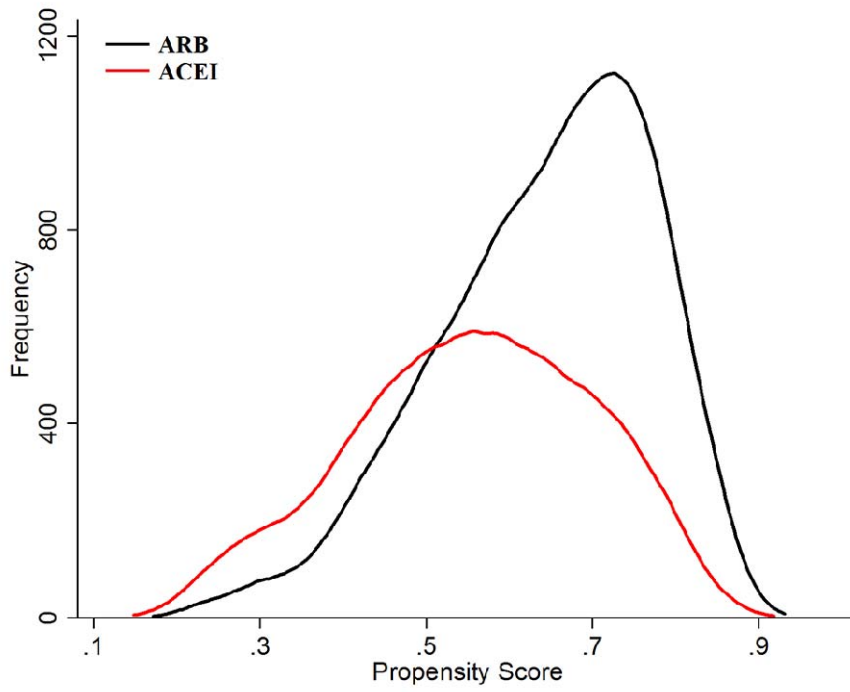

**(B) After matching**

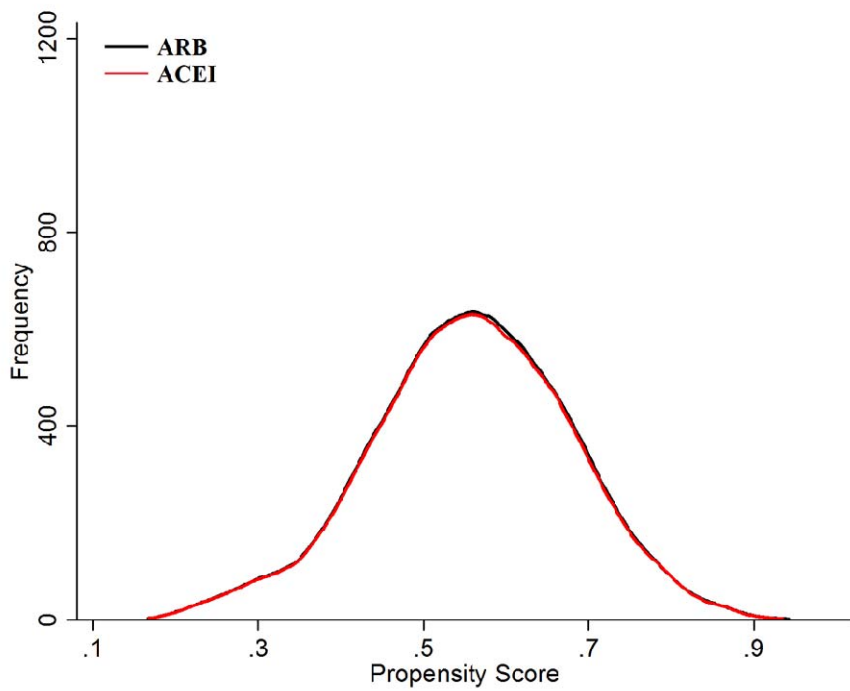

Supplement: 150771-res-Appendix_2.pdf [file 150771-res-Appendix_2.pdf]
